# Supplementary material for: Supercritical fluid-assisted modification combined with the resynthesis of SmCoO3 as an effective tool to enhance the long-term performance of SmCoO3-derived catalysts for the dry reforming of methane to syngas
Source: Royal Society of Chemistry journal article supplement (doi:10.1039/d2dt03026h), 2022-01-01
Supplement: d2dt03026h1.pdf [file d2dt03026h1.pdf]

**Supercritical Fluid assisted Modification combined with the Resynthesis as Effective Tool to  
Enhance Long-term Performance of  $\text{SmCoO}_3$  catalyst  
for Dry Reforming of Methane to Syngas**

Andrey V. Gavrikov<sup>a\*</sup>, Alexey S. Loktev<sup>a,c</sup>, Andrey B. Ilyukhin<sup>a</sup>, Igor E. Mukhin<sup>b</sup>,  
Mikhail A. Bykov<sup>d</sup>, Konstantin I. Maslakov<sup>d</sup>, Anton M. Vorobei<sup>a</sup>, Olga O. Parenago<sup>a</sup>,  
Alexey A. Sadovnikov<sup>a,c</sup>, Alexey G. Dedov<sup>a,c</sup>

*<sup>a</sup>Kurnakov Institute of General and Inorganic Chemistry, Russian Academy of Sciences, Moscow,  
Russian Federation,*

*<sup>b</sup>National University of Oil and Gas «Gubkin University», Moscow, Russian Federation,*

*<sup>c</sup>A.V. Topchiev Institute of Petrochemical Synthesis, RAS, Moscow, Russian Federation,*

*<sup>d</sup>Department of Chemistry, Lomonosov Moscow State University, Moscow, Russian Federation*

Dry reforming of methane to Syngas (DRM) is of increasing significance concerning, first, the production of raw for commercial organic/petrochemical syntheses and for hydrogen energetic, and, second, the utilization of two most harmful greenhouse gases. Herein, new  $\text{SmCoO}_3$ -based DRM catalysts derived from heterometallic precursor and operating without preliminary reduction are reported. For the first time, the effect of supercritical fluids-assisted modification of the  $\text{SmCoO}_3$ -derived catalysts combined with the restoration of spent catalysts to  $\text{SmCoO}_3$  onto its long-term performance was studied. Namely, the modification of heterometallic precursor by supercritical antisolvent precipitation (SAS) allows one to considerably decrease coke formation upon the exploitation of the derived  $\text{SmCoO}_3$  sample. Moreover, the re-oxidation of corresponding spent catalysts followed by pre-heating under  $\text{N}_2$  affords catalysts which stably provide Syngas yields of 88-95% for at least 41 h at 900 °C. The achieved yields are among the highest ones currently reported for DRM catalysts derived from both  $\text{LnMO}_3$

perovskites and related oxides. The origins of such good performance are discussed. Given the simplicity and availability of all applied methods and chemicals, this result opens prospects for the exploiting SAS in the design of efficient DRM catalysts.

---

\* Corresponding author. E-mail address:

[gavrikov@igic.ras.ru](mailto:gavrikov@igic.ras.ru);

[penguin1990@yandex.ru](mailto:penguin1990@yandex.ru)

**Keywords:** Dry reforming of methane; Syngas; CO<sub>2</sub> utilization; Heterogeneous catalysts; Lanthanide cobaltites; SmCoO<sub>3</sub>; Heterometallic precursors; Supercritical antisolvent precipitation; Solid-phase thermolysis

*Synthesis of*  $[\text{Co}(\text{phen})_3][\text{Sm}(\text{NO}_3)_5(\text{H}_2\text{O})]\cdot 2\text{MeCN}$  (**SmCo**) precursor for  $\text{SmCoO}_3$

To prepare **SmCo**, 2.29 g (5.15 mmol) of  $\text{Sm}(\text{NO}_3)_3\cdot 6\text{H}_2\text{O}$  was added to the solution of 1 g (5.15 mmol) of  $\text{Co}(\text{NO}_3)_2\cdot 6\text{H}_2\text{O}$  and 3.05 g (15.4 mmol) of  $\text{phen}\cdot \text{H}_2\text{O}$  in 50 ml of hot (80 °C) MeCN. Precipitation of product started in a minute after the dissolution of  $\text{Sm}(\text{NO}_3)_3\cdot 6\text{H}_2\text{O}$ . After cooling the reaction mixture to room temperature and its exposition for 6 h, 4.2 g (70 %) of single phase (Fig.S1) **SmCo** was formed as large dark-olive crystals.

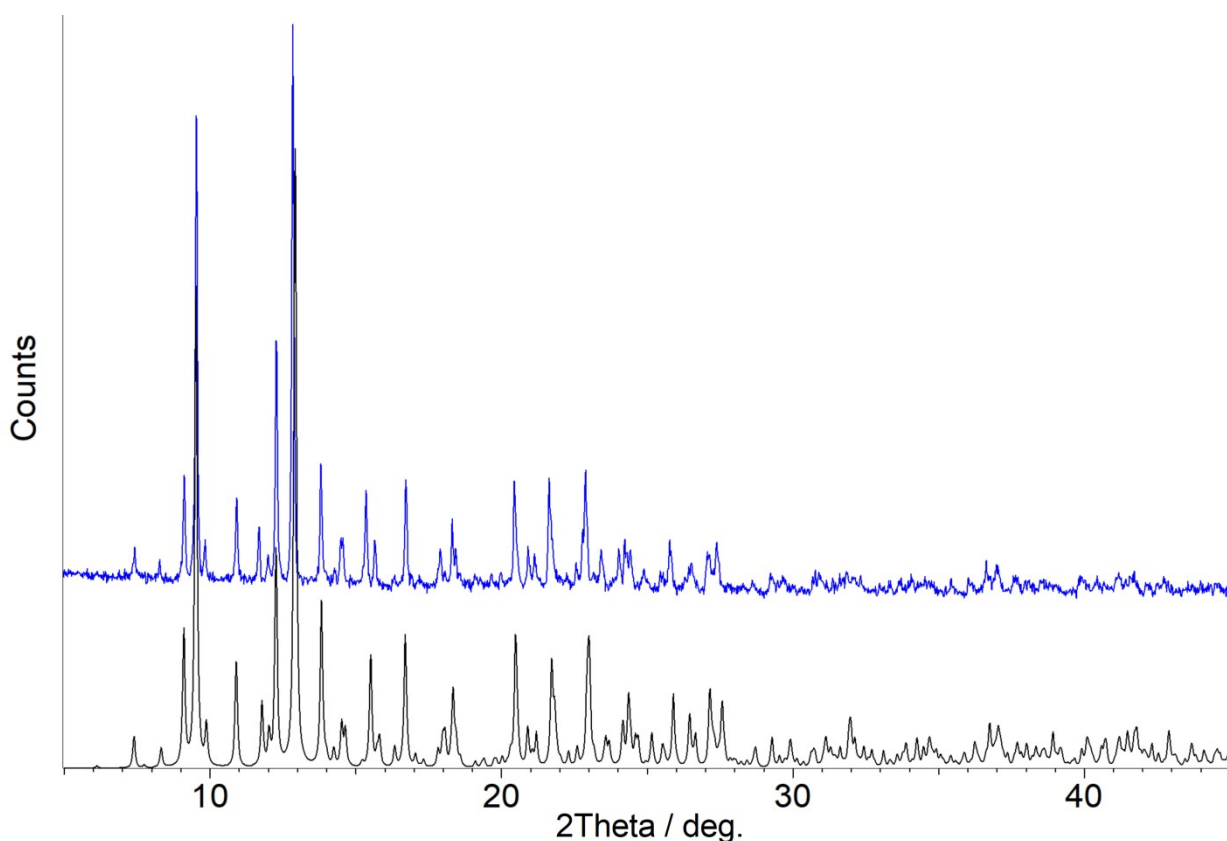

**Fig. S1.** Powder XRD pattern of **SmCo** (blue curve) in comparison with the calculated pattern for the  $[\text{Co}(\text{phen})_3][\text{Sm}(\text{NO}_3)_5(\text{H}_2\text{O})]\cdot 2\text{MeCN}$  precursor (this pattern can be extracted from CCDC 2099934) studied in [50] (black curve).

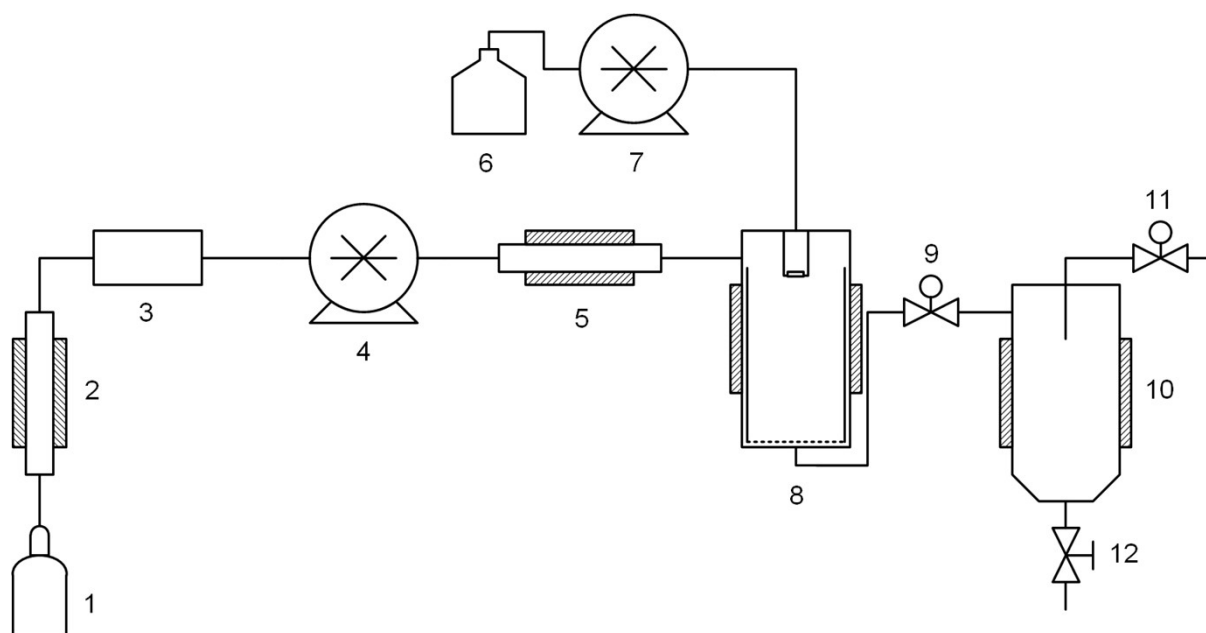

**Fig. S2.** Scheme of the setup for supercritical antisolvent precipitation:

1- CO<sub>2</sub> source; 2- cooling heat exchanger; 3 - Coriolis flowmeter; 4 - CO<sub>2</sub> pump; 5- heater; 6 - solution of precursor **1**; 7 - solution pump; 8- precipitation chamber, 9-automatic pressure regulator; 10 - cyclone separator; 11 - manual pressure regulator; 12 - drain valve.

The solution of **SmCo** (3 g) in methanol (250 ml) was introduced into the device, and pressure, temperature and rate of CO<sub>2</sub> flow were set to reach the operating values.

SAS micronization was performed at 40 °C and 150 bar with 50 g/min CO<sub>2</sub> flow and 1 ml/min solution flow. The diameter of spray nozzle was 200 μm. The liquid pump 7 was filled with methanol, 5 ml of which was sprayed at an operating rate into the precipitation vessel 8 to balance the composition of the fluid in the vessel. After that, the inlet line of the pump was moved into a container 6 with solution of **SmCo** which was further sprayed at the same rate. After spraying all solution of **SmCo**, an additional 15 ml of methanol was supplied to flush the solution supply line upstream of the spray nozzle. At the end of the spraying, the CO<sub>2</sub> flow was additionally maintained in the precipitation vessel 8 for 2 hours to flush out the residual methanol from the product. After ceasing the flow of CO<sub>2</sub>, the pressure was gradually released to atmospheric *via* regulator 9. The resulting **SAS\_SmCo** product was removed from the precipitation vessel 8 using a built-in basket. To remove residual methanol, the samples were additionally exposed at 80 °C for 1 h.

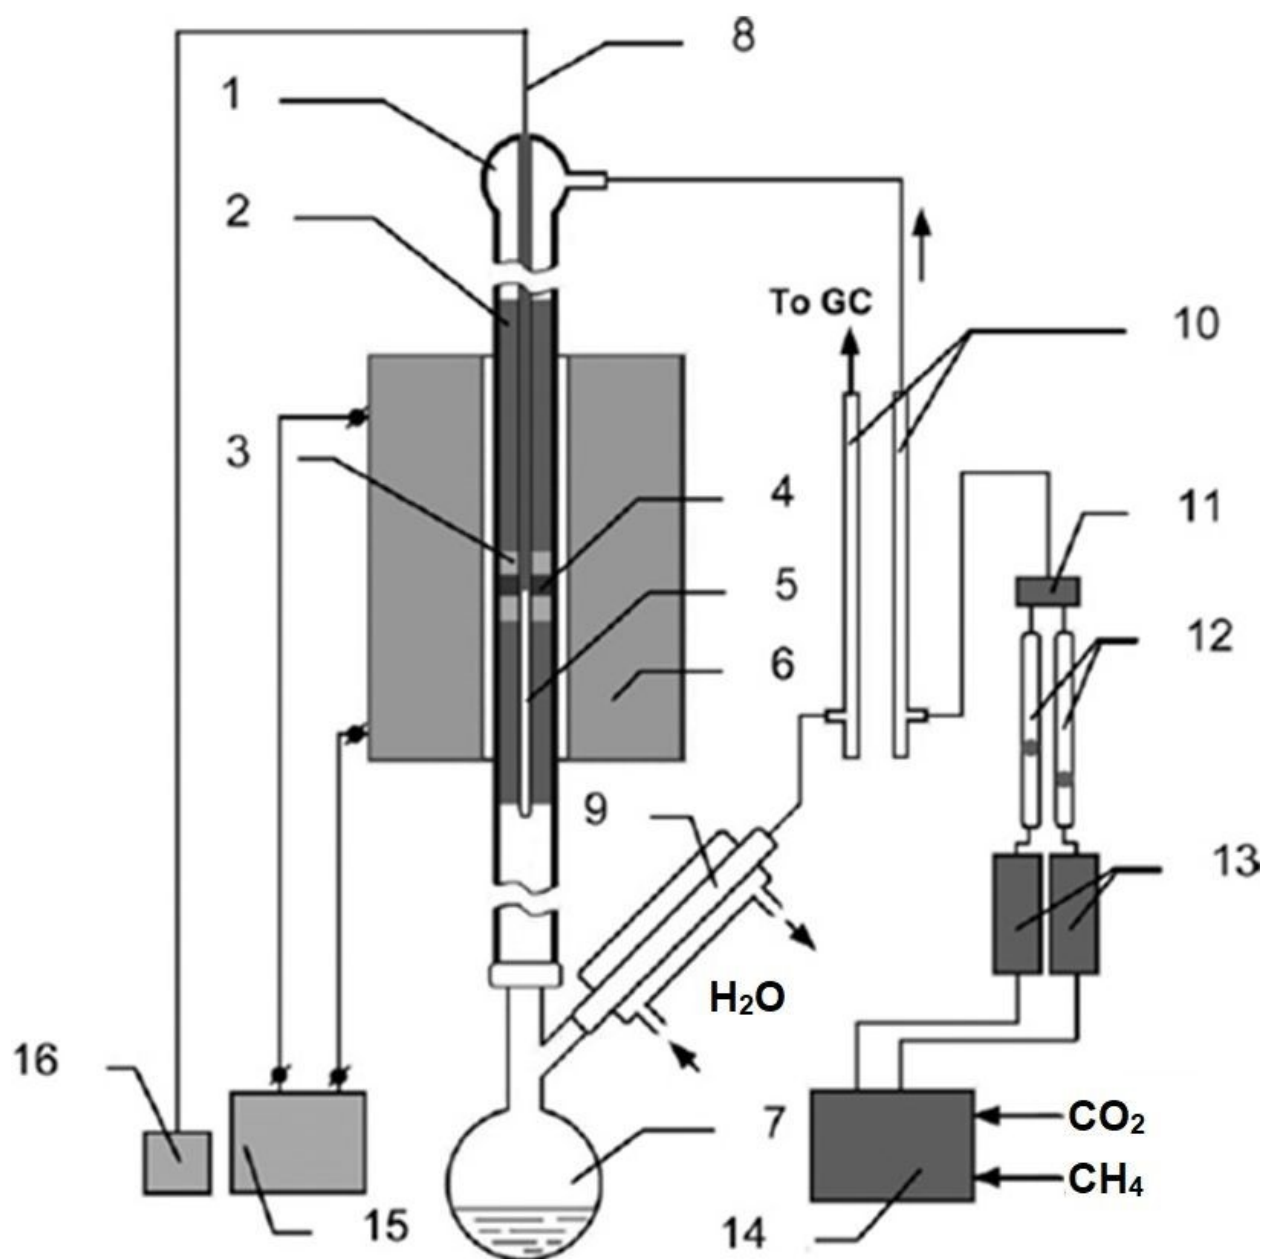

**Fig. S3.** Single-pass plug-flow setup. (1) Quartz reactor, (2) quartz-glass insert, (3) quartz wool, (4) catalyst, (5) internal pocket for thermocouple, (6) electric furnace, (7) condensate receiver (round-bottom flask), (8) thermocouple, (9) water cooler, (10) flow meters, (11) gas mixer, (12) ball-in-tube flow meters, (13) adsorbent, (14) gas flows shaper, (15) furnace controller, (16) temperature indicator.

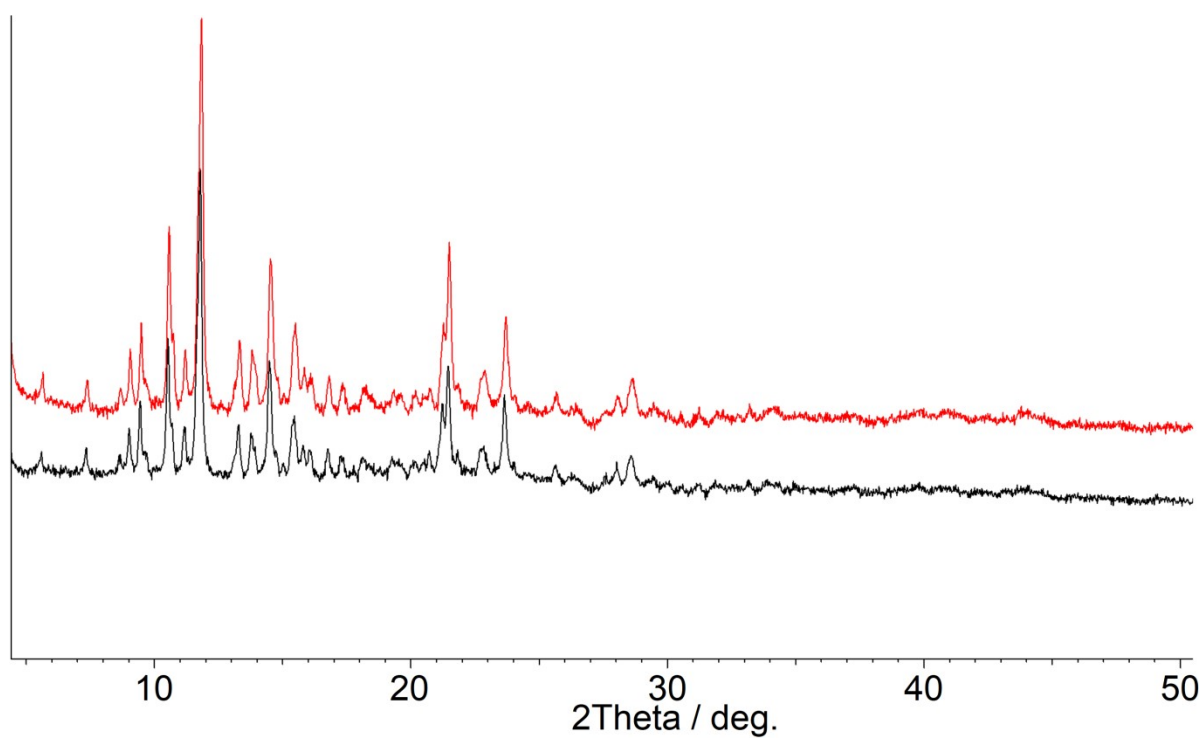

**Fig. S4.** Powder XRD pattern of **SAS\_SmCo** (red curve) and similarly prepared sample studied in [50] (black curve).

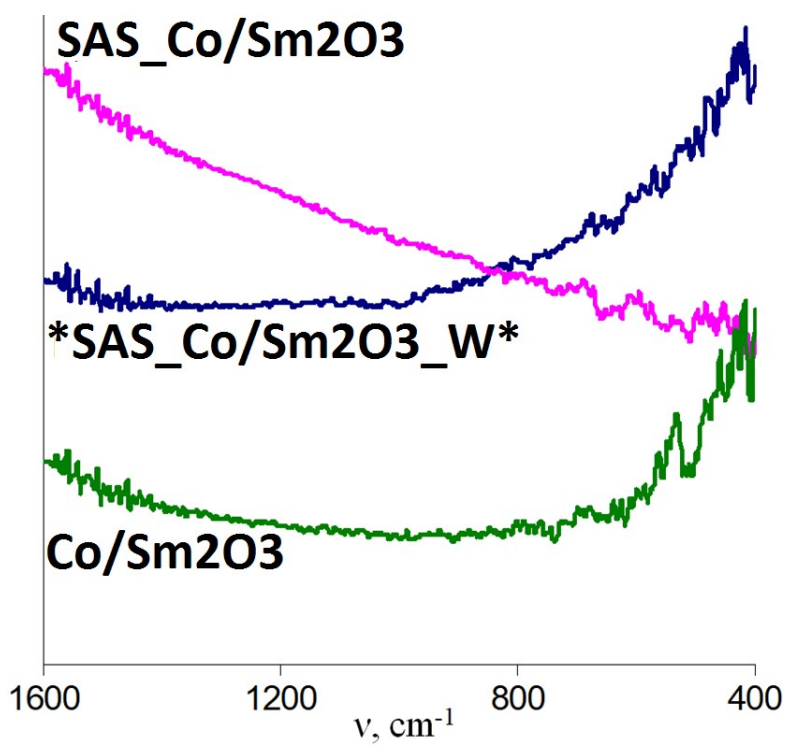

**Fig. S5.** IR spectra of spent catalysts after DRM process.

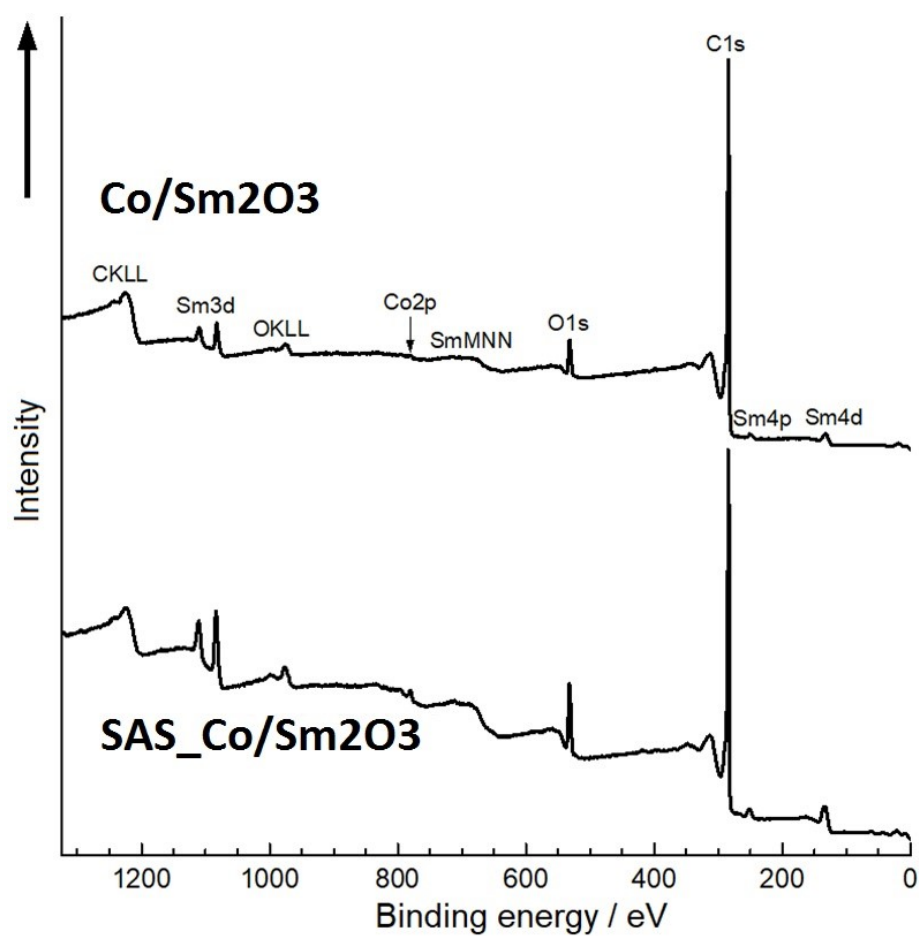

**Fig. S6.** Survey XPS spectra of **Co/Sm<sub>2</sub>O<sub>3</sub>** and **SAS\_Co/Sm<sub>2</sub>O<sub>3</sub>** spent catalysts.

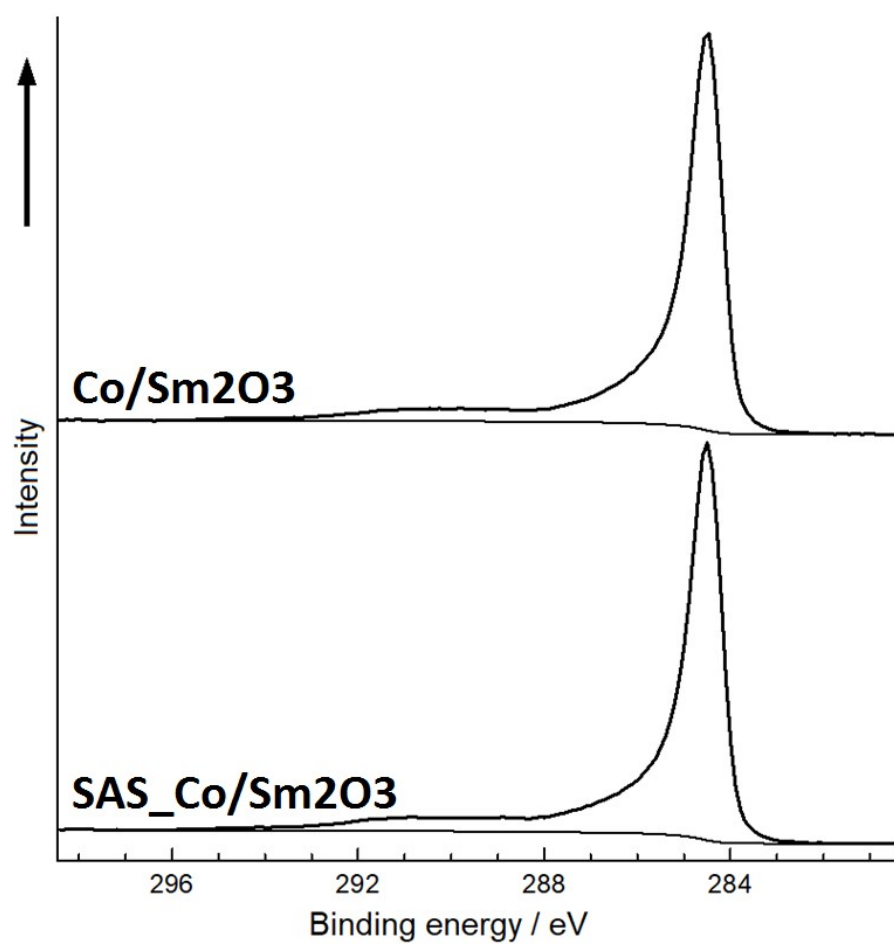

**Fig. S7.** C1s XPS spectra of **Co/Sm2O3** and **SAS\_Co/Sm2O3** spent catalysts.

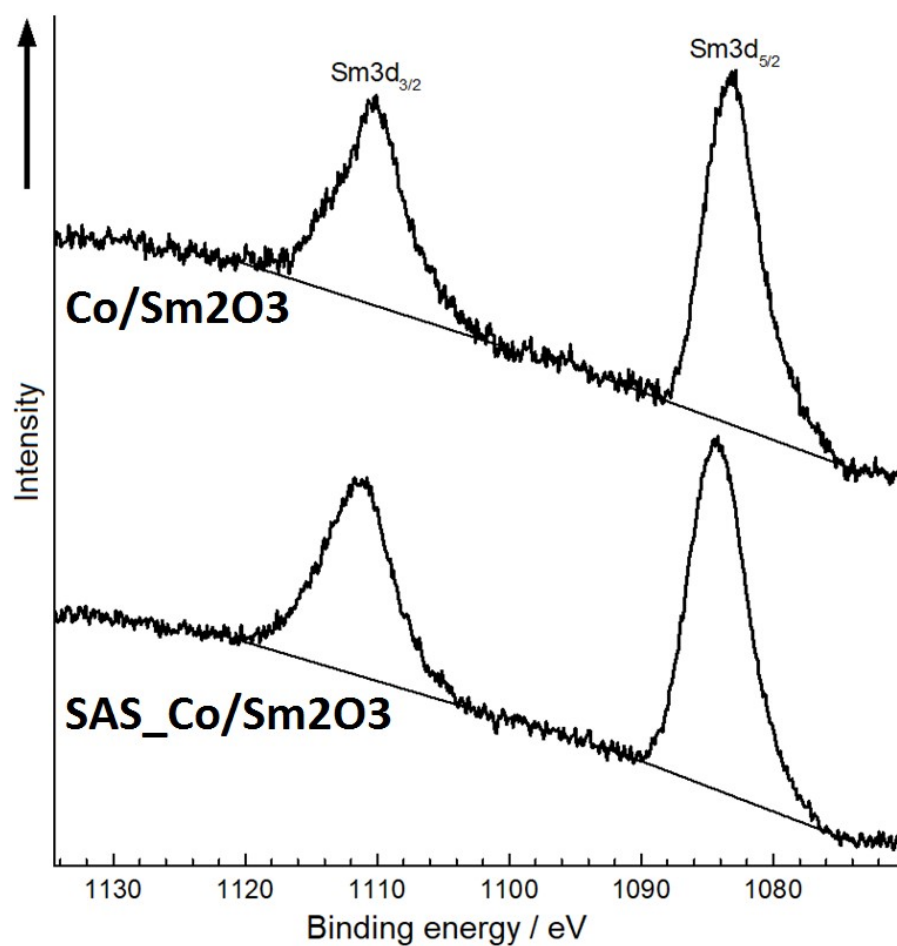

**Fig. S8.** Sm<sub>3d</sub> XPS spectra of **Co/Sm<sub>2</sub>O<sub>3</sub>** and **SAS\_Co/Sm<sub>2</sub>O<sub>3</sub>** spent catalysts.

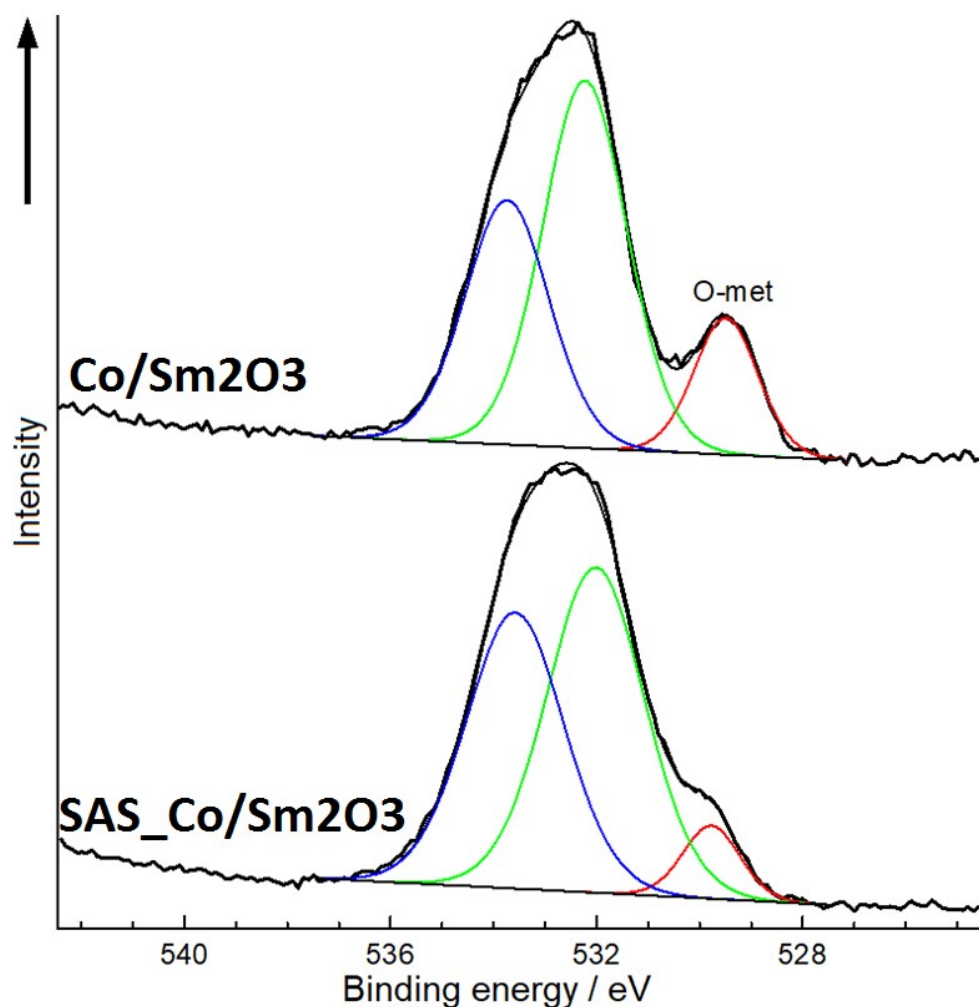

**Fig. S9.** O1s XPS spectra of **Co/Sm2O3** and **SAS\_Co/Sm2O3** spent catalysts.

**Table S1.** Content of different Co species (at. %) on the surface of spent catalysts determined from the fitting of Co2pXPS spectra with synthetic components. Co2p<sub>3/2</sub> binding energies (eV) of components are shown in parenthesis.

| Sample              | Co <sup>0</sup> | Co <sup>2+</sup> | Co <sup>3+</sup> |
|---------------------|-----------------|------------------|------------------|
| <b>SAS_Co/Sm2O3</b> | 0 (777.9)       | 40 (781.9)       | 60 (779.9)       |
| <b>Co/Sm2O3</b>     | 5 (777.9)       | 28 (781.7)       | 67 (780.0)       |

**Table S2.** Results of blank experiments.

| T, °C | X CH <sub>4</sub> , % | X CO <sub>2</sub> , % | Products yield, %             |    |                |      |
|-------|-----------------------|-----------------------|-------------------------------|----|----------------|------|
|       |                       |                       | C <sub>2</sub> H <sub>4</sub> | CO | H <sub>2</sub> | Coke |
| 700   | 5                     | 6                     | 0                             | 0  | 1              | 5    |
| 800   | 4                     | 3                     | 0                             | 0  | 1              | 3    |
| 900   | 5                     | 8                     | 0                             | 0  | 1              | 6    |
| 900   | 5                     | 6                     | 0,5                           | 0  | 1              | 6    |

### ***Temperature-programmed reduction of SAS\_SmCoO3 sample***

Initially, H<sub>2</sub>-TPR profile was recorded in 50-850 °C range (Fig. S10a). Near 160 °C, drastic decrease in the background intensity was observed, which can be explained by the H<sub>2</sub>O desorption from the pores of the sample. Above 700 °C, notable increase of the baseline occurs due to H<sub>2</sub> adsorption by the resulting material. Thus, representative temperature range of 200-700 °C was further analyzed (Fig. S10b). In this range, two distinct and intensive peaks at 400 °C and 528 °C are observed. These peaks agree well with the literature data for H<sub>2</sub>-TPR of SmCoO<sub>3</sub> [1-4]. The peak at 400 °C is associated with the process of single-electron reduction of Co<sup>3+</sup> to Co<sup>2+</sup> within SmCoO<sub>3</sub> structure:

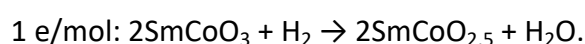

The second peak at 528 °C indicates triply-electron reduction of perovskite phase to Co/Sm<sub>2</sub>O<sub>3</sub> composite:

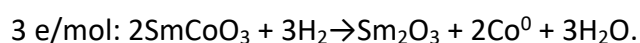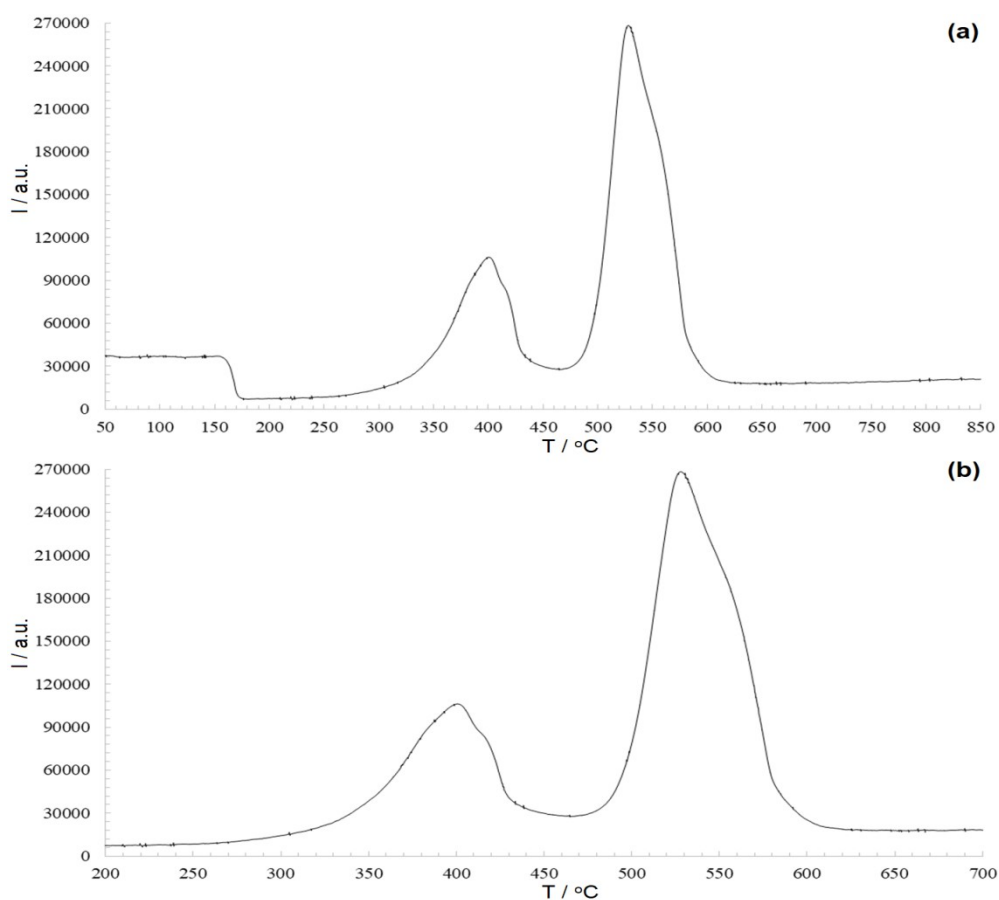

**Fig S10.** H<sub>2</sub>-TPR profile of **SAS\_SmCoO3** sample in 50-850 (a) and 200-700 °C (b) range.

1. O.U. Osazuwa, H.D. Setiabudi, R.A. Rasid, C.K. Cheng, *J. Nat. Gas Sci. Eng.*, 2017, **37**, 435-448. <https://doi.org/10.1016/j.jngse.2016.11.060>;
2. O.U. Osazuwa, C.K. Cheng, *J. Clean. Prod.*, 2017, **148**, 202-211. <https://doi.org/10.1016/j.jclepro.2017.01.177>;
3. O.U. Osazuwa, C.K. Cheng, *Malaysian J. Catal.*, 2017, **2**, 12-17. <https://mjcat.utm.my/index.php/MalJCat/article/view/23>;
4. R. Lago, G. Bini, M.A. Peña, J.L.G. Fierro, *J. Catal.*, 1997, **167**, 198-209. <https://doi.org/10.1006/jcat.1997.1580>.

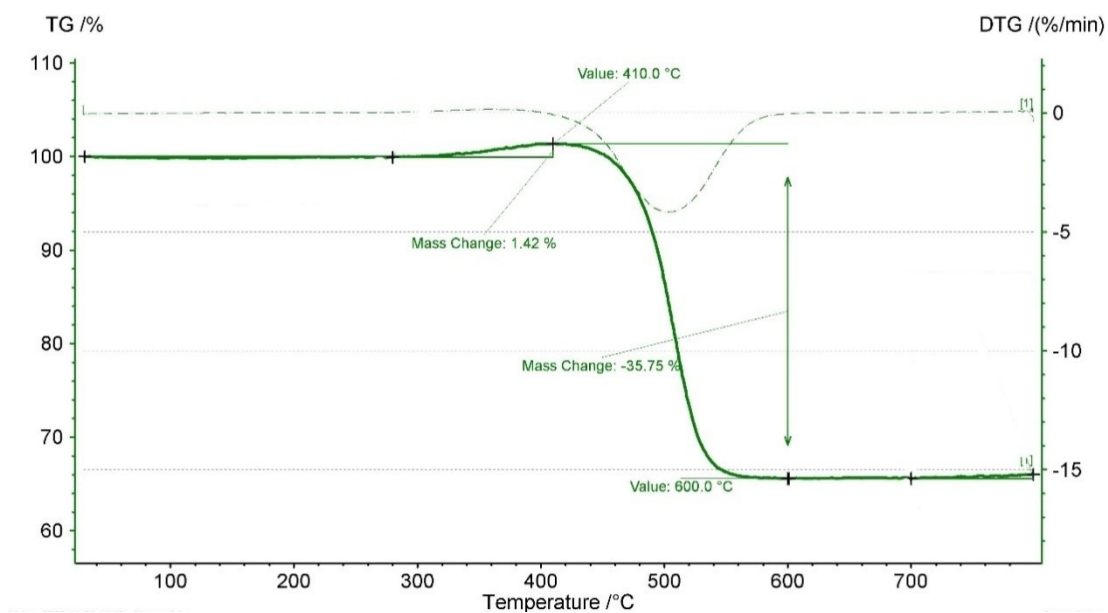

**Fig S11.** TG (solid line) and DTA (dashed line) of **\*SAS\_Co/Sm<sub>2</sub>O<sub>3</sub>\_W\*** sample.

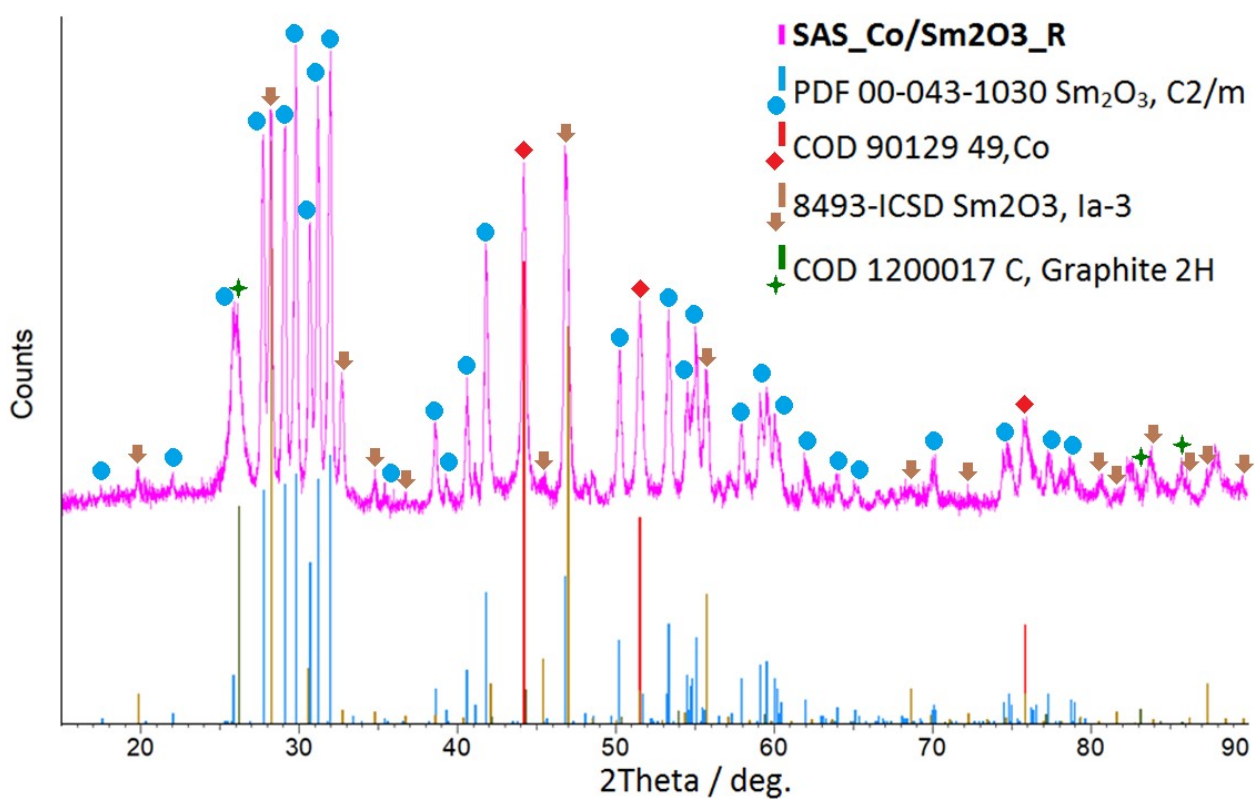

**Fig S12.** Powder XRD pattern of **SAS\_Co/Sm<sub>2</sub>O<sub>3</sub>\_R** sample.

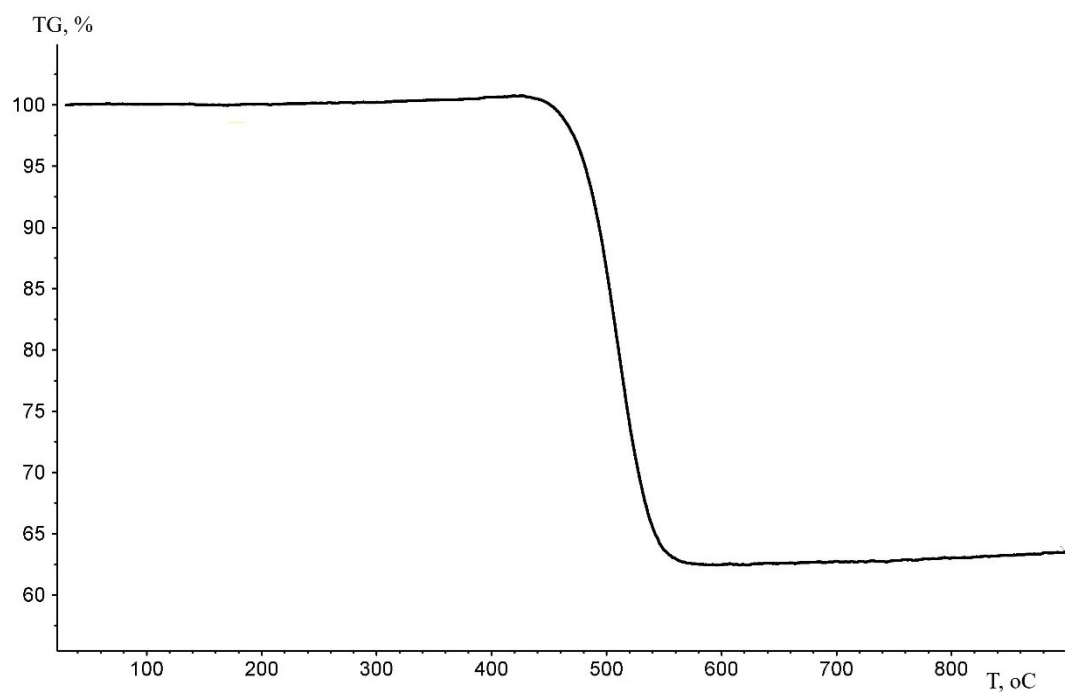

**Fig S13.** TG curve of SAS\_Co/Sm<sub>2</sub>O<sub>3</sub>\_R sample.

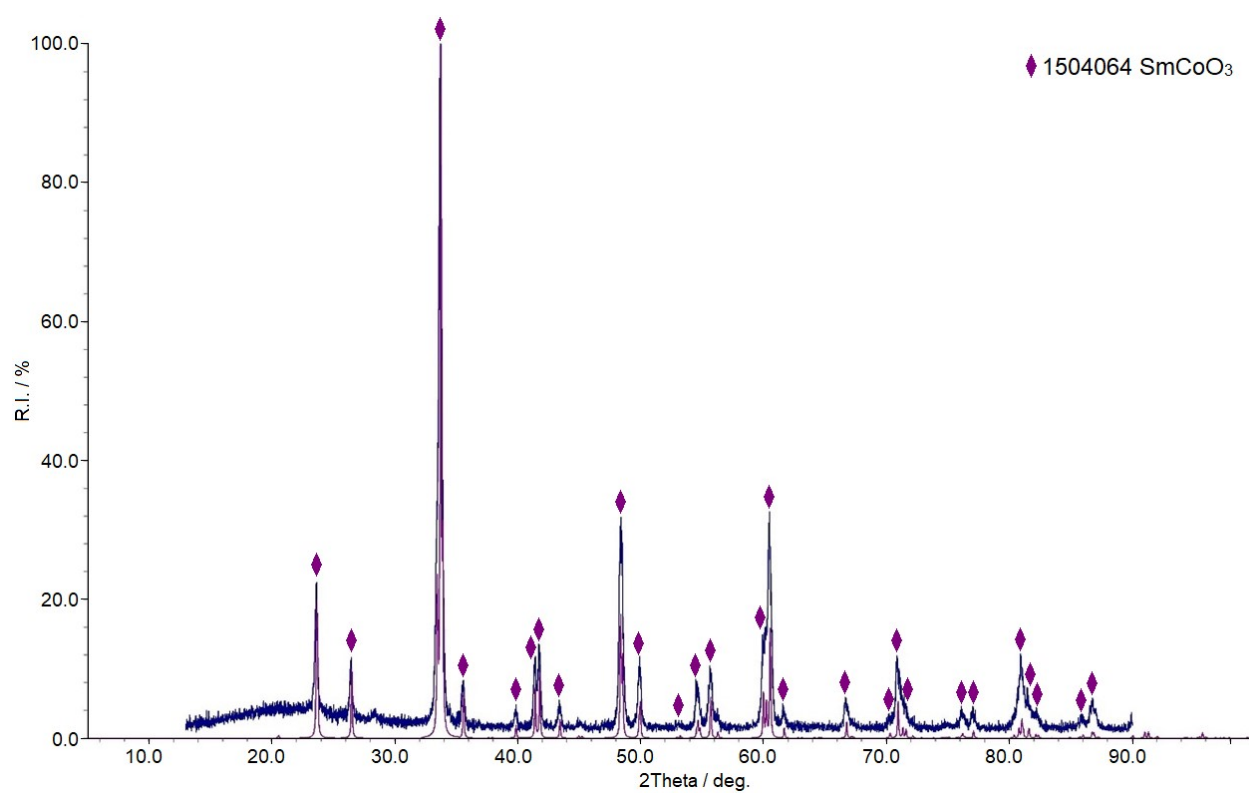

**Fig. S14.** Powder XRD pattern of SAS\_Co/Sm<sub>2</sub>O<sub>3</sub> sample after its annealing at 800 °C for 2 h.

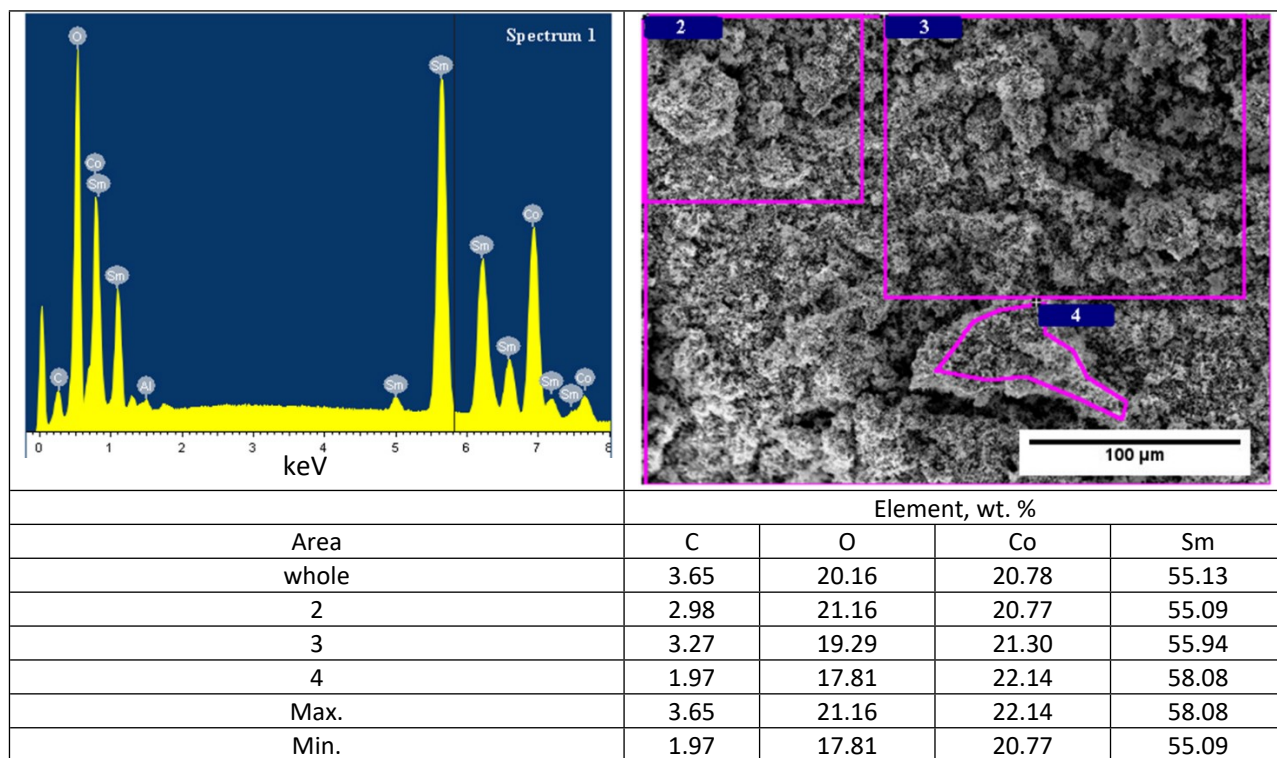

**Fig. S15.**EDX data of **SAS\_Co/Sm<sub>2</sub>O<sub>3</sub>** sample after its annealing at 800 °C for 2 h.

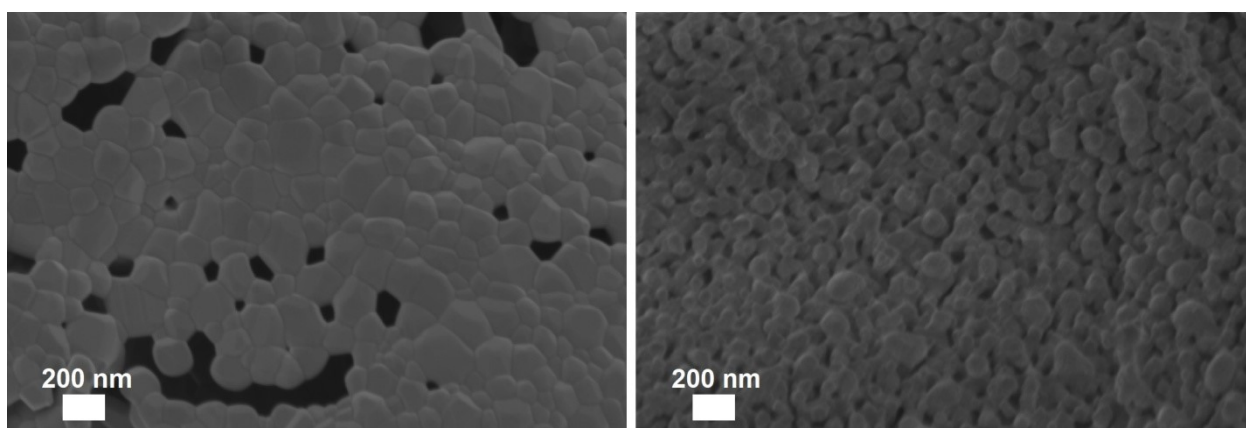

**Fig. S16.**SEM images (×100000) of **\*SAS\_Co/Sm<sub>2</sub>O<sub>3</sub>\*** (left) and **SAS\_SmCoO<sub>3</sub>\_R** (right) catalysts.

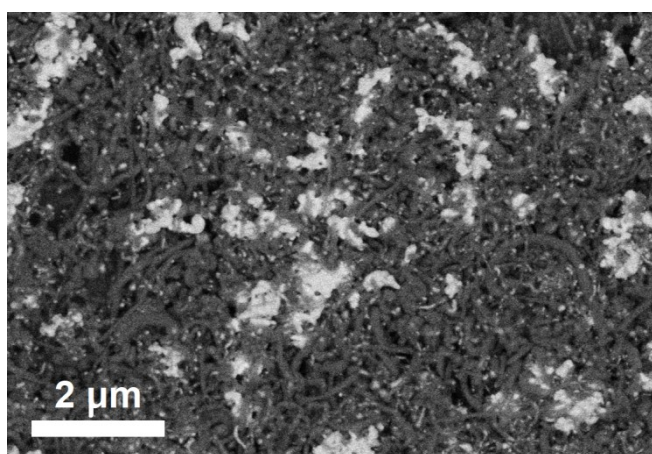

**Fig. S17.** SEM image (×30000) of **SAS\_Co/Sm<sub>2</sub>O<sub>3</sub>\_R** spent catalyst.
